# Supplementary material for: Preliminary Results of Feasibility and Acceptability of Self-Collection for Cervical Screening in Italian Women
Source: MDPI journal article supplement (doi:10.3390/pathogens12091169), 2023-09-17
Supplement: s1 [file s1]

**Identification Code:** .....

**Year of birth:** .....

**Height:** .....

**Weight:** .....

**Level of Education**

- Elementary school
- Middle school
- High school
- Degree

**Civil Status**

- Single
- Married
- Divorced
- Widow

**Smoking status:** Yes/No

**Menopause status:** Yes/No

**Use of contraceptives:** Yes/ No

**Use of condoms**

- Never
- Occasionally
- Only in the past
- Always

**Previous history of STIs:** Yes/NO

**Year of previous Pap-test:** .....

**Acceptability questionnaire:**

|                                                                                           |        |
|-------------------------------------------------------------------------------------------|--------|
| Q1: Did you find the self-collection instruction clear and understandable?                | Yes/NO |
| Q2: Did you find self-collection easy to perform?                                         | Yes/NO |
| Q3: Do you prefer using the vaginal self-collection than the clinician-collection device? | Yes/NO |
